# Supplementary material
Source: publisher figshare collection journal article supplement (https://karger.figshare.com/articles/dataset/_/4246169)
Supplement: Supplementary file 1 [file 1]

Archive with 4 entries (4 files):
- DRM450920_sm1.pdf
- DRM450920_sm2.pdf
- DRM450920_sm3.PDF
- DRM450920_sm4.PDF
