# Supplementary material
Source: publisher figshare collection journal article supplement (https://karger.figshare.com/articles/dataset/_/4246169)
Supplement: Supplementary file 1 [file 1 › DRM450920_sm2.pdf]

**Suppl. Table 1.** Clinicopathological parameters of patients with metastatic and non-metastatic cSCC

|                            |                      | Metastatic<br>( <i>n</i> = 22) | Non-metastatic<br>( <i>n</i> = 76) | p value |
|----------------------------|----------------------|--------------------------------|------------------------------------|---------|
| Age, years                 | Mean                 | 78                             | 76                                 | 0.436   |
|                            | Median               | 80                             | 76                                 |         |
|                            | Minimum-maximum      | 56–95                          | 42–96                              |         |
| Sex                        | Female               | 8 (36.4%)                      | 23 (30.3%)                         | 0.588   |
|                            | Male                 | 14 (63.6%)                     | 53 (69.7%)                         |         |
| Deceased                   | Yes (cSCC)           | 4 (18.2%)                      | 0 (0%)                             | 0.002   |
|                            | Yes (other cause)    | 5 (22.7%)                      | 23 (30.3%)                         |         |
|                            | No                   | 6 (27.3%)                      | 19 (25.0%)                         |         |
|                            | Unknown              | 7 (31.8%)                      | 34 (44.7%)                         |         |
| Immunosuppression          | No                   | 20 (90.9%)                     | 55 (72.4%)                         | 0.071   |
|                            | Yes                  | 2 (9.1%)                       | 21 (27.6%)                         |         |
| Sentinel lymph node        | No                   | 18 (81.8%)                     | 55 (72.4%)                         | 0.371   |
|                            | Yes                  | 4 (18.2%)                      | 21 (27.6%)                         |         |
|                            | Results positive     | 3 (75.0%)                      | 0 (0%)                             |         |
|                            | Results negative     | 1 (25.0%)                      | 21 (100%)                          |         |
| Primary cSCC               |                      |                                |                                    | <0.001  |
| Tumour invasion            | ≤5 mm                | 8 (36.4%)                      | 46 (60.5%)                         | 0.034   |
|                            | >5 mm                | 13 (59.1%)                     | 30 (39.5%)                         |         |
|                            | Unknown              | 1 (4.5%)                       | 0 (0%)                             |         |
|                            | Mean                 | 6.4                            | 5.2                                |         |
| Localisation of cSCC       | Median               | 6                              | 4.1                                | 0.204   |
|                            | Minimum-maximum      | 1.1–17                         | 1–19                               |         |
|                            | Head and neck        | 16 (72.7%)                     | 47 (61.8%)                         |         |
|                            | Upper extremity/hand | 1 (4.5%)                       | 8 (10.5%)                          |         |
| Localisation of metastasis | Trunk                | 1 (4.5%)                       | 9 (11.8%)                          | 0.587   |
|                            | Lower extremity      | 4 (18.2%)                      | 12 (15.8%)                         |         |
|                            | Regional skin        | 14 (63.6%)                     | 0 (0%)                             |         |
|                            | Regional lymph nodes | 8 (36.4%)                      | 0 (0%)                             |         |
| Grading                    | Distant metastases   | 0 (0%)                         | 0 (0%)                             | <0.001  |
|                            | No metastases        | 0 (0%)                         | 76 (100%)                          |         |
|                            | G1                   | 5 (13.9%)                      | 12 (23.1%)                         |         |
|                            | G2                   | 40 (76.9%)                     | 5 (55.6%)                          |         |
| Grading                    | G3                   | 4 (44.4%)                      | 1 (100%)                           | 0.058   |
|                            | Unknown              | 0 (0%)                         | 0 (0%)                             |         |

MET, metastasis; NMET, no metastasis.

**Suppl. Table 2.** Immunohistochemical staining of E-cadherin and podoplanin in metastatic and non-metastatic cSCC

| Staining<br>( <i>n</i> = 102) |                | Metastatic<br>( <i>n</i> = 22) | Non-metastatic<br>( <i>n</i> = 80) | p value |
|-------------------------------|----------------|--------------------------------|------------------------------------|---------|
| E-cadherin                    | Quantity       | 0                              | 1 (4.5%)                           | 0.805   |
|                               |                | 1                              | 3 (13.6%)                          |         |
|                               |                | 2                              | 3 (13.6%)                          |         |
|                               |                | 3                              | 5 (22.7%)                          |         |
|                               |                | 4                              | 10 (45.5%)                         |         |
|                               | Quality        | 0                              | 1 (4.5%)                           | 0.136   |
|                               |                | 1                              | 9 (40.9%)                          |         |
|                               |                | 2                              | 8 (36.4%)                          |         |
|                               |                | 3                              | 4 (18.2%)                          |         |
|                               |                | 4                              | 0 (0%)                             |         |
|                               | Cellular level | Membranous                     | 19 (86.4%)                         | 0.795   |
|                               |                | Cytoplasmic                    | 2 (9.1%)                           |         |
|                               |                | No staining                    | 1 (4.5%)                           |         |
| Podoplanin                    | Quantity       | 0                              | 3 (13.6%)                          | 0.002   |
|                               |                | 1                              | 4 (18.2%)                          |         |
|                               |                | 2                              | 8 (36.4%)                          |         |
|                               |                | 3                              | 1 (4.5%)                           |         |
|                               |                | 4                              | 6 (27.3%)                          |         |
|                               | Quality        | 0                              | 3 (13.6%)                          | 0.571   |
|                               |                | 1                              | 2 (9.1%)                           |         |
|                               |                | 2                              | 12 (54.5%)                         |         |
|                               |                | 3                              | 5 (22.7%)                          |         |
|                               |                | 4                              | 0 (0%)                             |         |
|                               | Cellular level | Membranous                     | 10 (45.5%)                         | 0.444   |
|                               |                | Cytoplasmic                    | 9 (40.9%)                          |         |
|                               |                | No staining                    | 3 (13.6%)                          |         |

**Suppl. Table 3.** Evaluation system of immunohistochemical staining of E-cadherin and podoplanin

|                |                                               |             |
|----------------|-----------------------------------------------|-------------|
| Quantity       | Percentage of positively stained tumour cells |             |
|                | 0                                             | 0%          |
|                | 1                                             | 01–25%      |
|                | 2                                             | 26–50%      |
|                | 3                                             | 51–75%      |
|                | 4                                             | 76–100%     |
| Quality        | Staining in reference to the epidermis        |             |
|                | 0                                             | No staining |
|                | 1                                             | Low         |
|                | 2                                             | Equal       |
|                | 3                                             | Strong      |
|                | 4                                             | Very strong |
| Cellular level | Membranous                                    |             |
|                | Cytoplasmic                                   |             |
|                | No staining                                   |             |

**Suppl. Table 4.** Comparison of immunohistochemical results: 14 pairs of cSCC and corresponding skin metastases ( $n = 10$ ) and lymph node metastases ( $n = 4$ ) by applying the Student  $t$  test

|                                            | $p$ value<br>E-cadherin | $p$ value<br>podoplanin |
|--------------------------------------------|-------------------------|-------------------------|
| cSCC and metastases ( $n = 14$ )           |                         |                         |
| Quantity                                   | 0.031                   | 0.793                   |
| Quality                                    | 0.385                   | 0.435                   |
| Cellular level                             | 1.000                   | 0.720                   |
| cSCC and skin metastases ( $n = 10$ )      |                         |                         |
| Quantity                                   | 0.217                   | 0.591                   |
| Quality                                    | 1.000                   | 0.081                   |
| Cellular level                             | 0.591                   | 0.678                   |
| cSCC and lymph node metastases ( $n = 4$ ) |                         |                         |
| Quantity                                   | 0.069                   | 0.391                   |
| Quality                                    | 0.215                   | 0.638                   |
| Cellular level                             | 0.391                   | 1.000                   |
