# Supplementary material
Source: publisher figshare collection journal article supplement (https://karger.figshare.com/articles/dataset/_/4246169)
Supplement: Supplementary file 1 [file 1 › DRM450920_sm3.PDF]

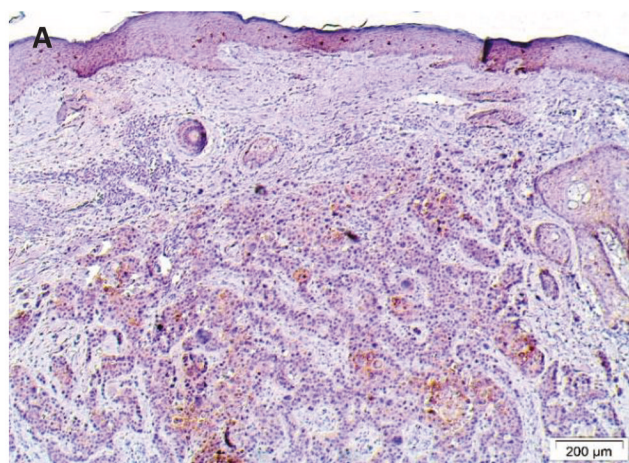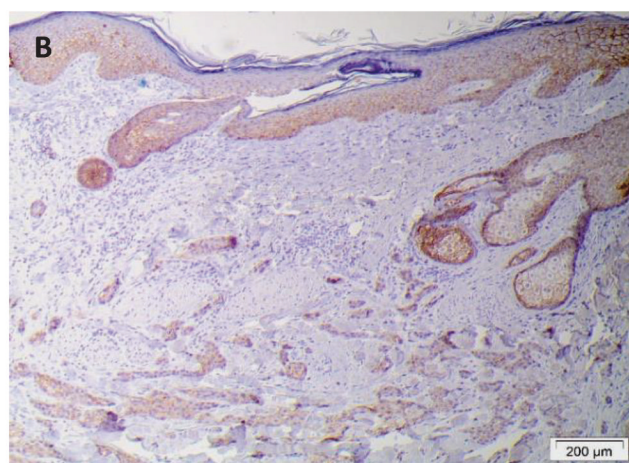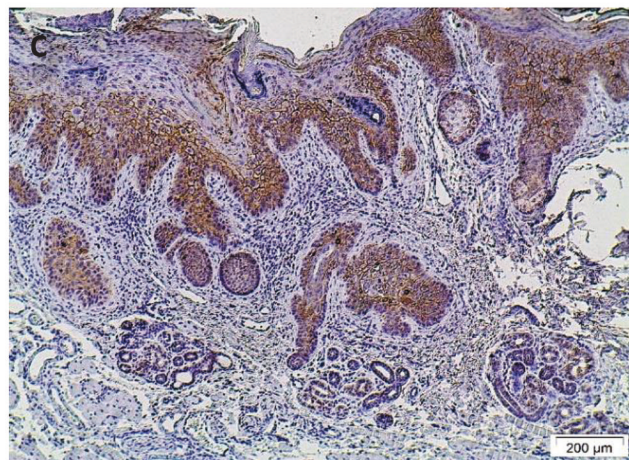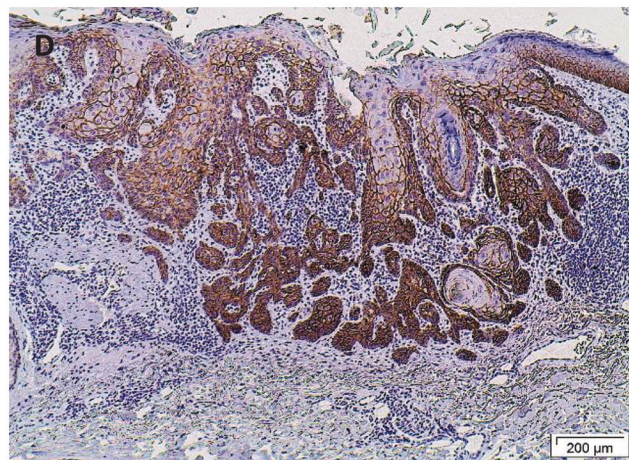

**Suppl. Fig. 1.** Immunohistochemical E-cadherin expression with increasing percentage of positively stained tumour cells. The figure shows 4 different primary cSCC (200  $\mu$ m) with immunohistochemical staining of E-cadherin and an increasing percentage of positively stained tumour cells varying between <25% (**a**), 26–50% (**b**), 51–75% (**c**), and >75% (**d**).
